# Supplementary material
Source: MDPI journal article supplement (https://www.mdpi.com/2673-8007/4/1/3)
Supplement: s1 [file s1]

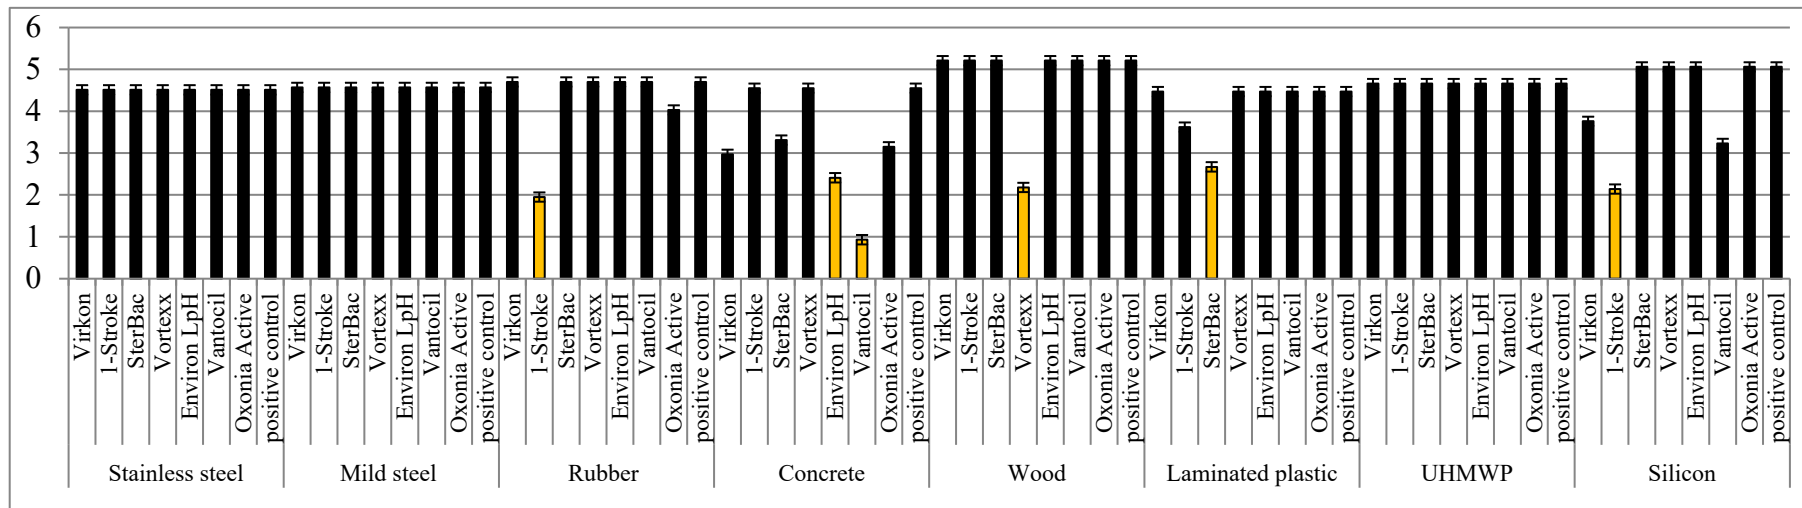

**Figure S1.** Log reductions of *Listeria monocytogenes* biofilms on eight hard surfaces exposed to seven disinfectants for 10 minutes. Biofilms were also exposed to disinfectants for 1 hour (not shown). Black bars achieved at least a 3-log reduction at 10 minutes. Yellow bars achieved a 3-log reduction after 1 hour, but not at 10 minutes. Error bars represent the standard error of the mean.

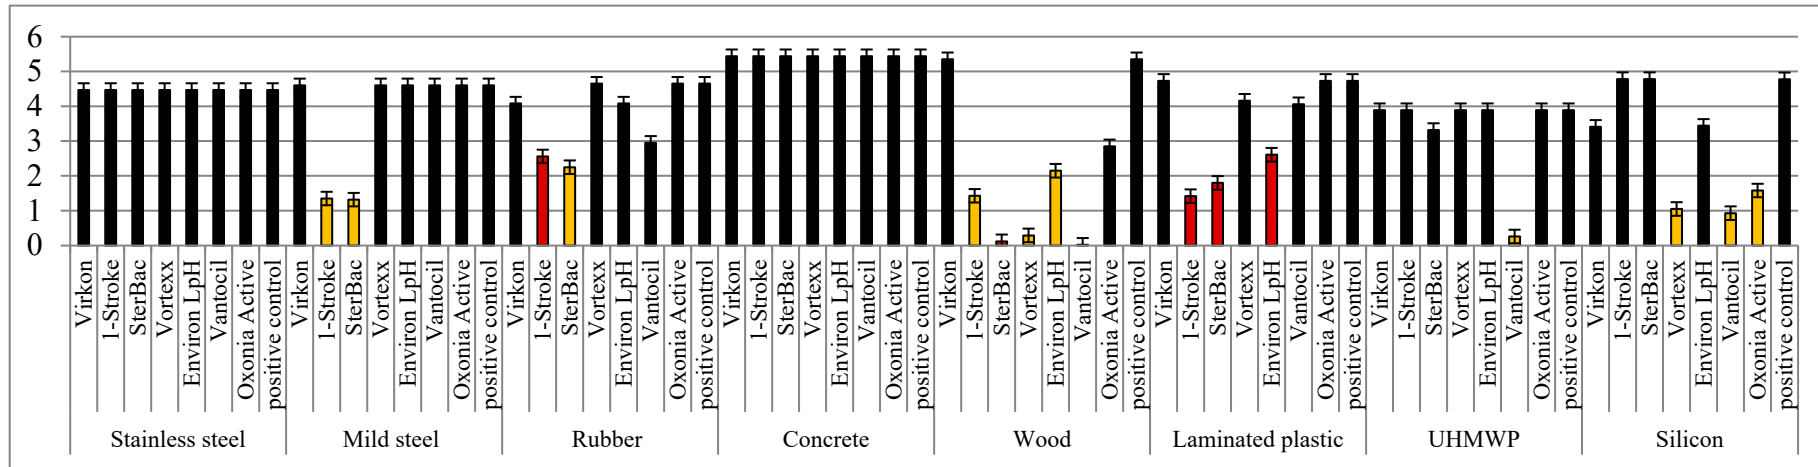

**Figure S2.** Log reductions of *E. coli* 0157:H7 biofilms on eight hard surfaces exposed to seven disinfectants for 10 minutes. Biofilms were also exposed to disinfectants for 1 hour (not shown). Black bars achieved at least a 3-log reduction. Yellow bars achieved a 3-log reduction after 1 hour, but not at 10 minutes. Red bars did not achieve a 3-log reduction after 10 minute or 1 hour exposures. Error bars represent the standard error of the mean.

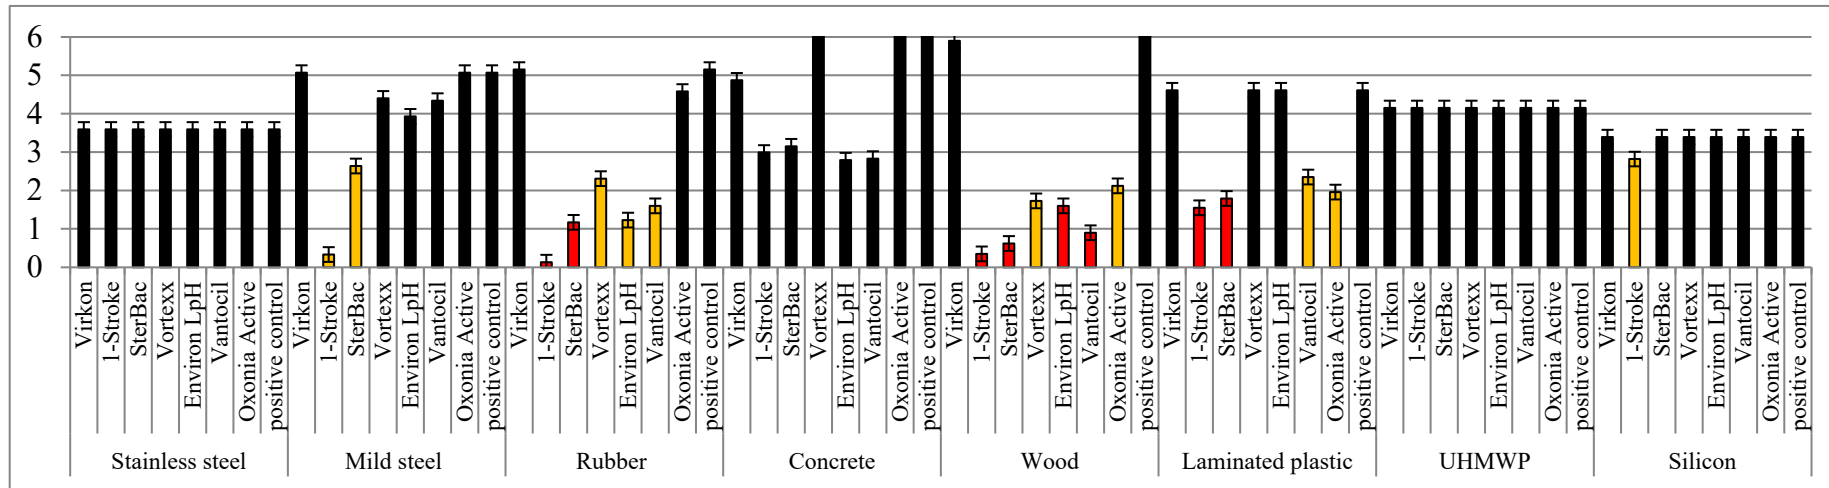

**Figure S3.** Log reductions of *S. choleraesuis* biofilms on eight hard surfaces exposed to seven disinfectants for 10 minutes. Biofilms were also exposed to disinfectants for 1 hour (not shown). Black bars achieved at least a 3-log reduction. Yellow bars achieved a 3-log reduction after 1 hour, but not at 10 minutes. Red bars did not achieve a 3-log reduction after 10 minute or 1 hour exposures. Error bars represent the standard error of the mean.
